# Supplementary material for: Uncoupling Protein 3 Catalyzes the Exchange of C4 Metabolites Similar to UCP2
Source: MDPI journal article supplement (doi:10.3390/biom14010021), 2023-12-22
Supplement: s1 [file s1]

## SUPPORTING INFORMATION

### **Uncoupling protein 3 catalyzes the exchange of C4 metabolites similar to UCP2.**

Jürgen Kreiter<sup>1,2,§</sup>, Tatiana Tyshchuk<sup>1,§</sup>, Elena E. Pohl<sup>1,\*</sup>

<sup>1</sup> Institute of Physiology, Pathophysiology and Biophysics,  
University of Veterinary Medicine, A-1210 Vienna, Austria

<sup>2</sup> Present address: Institute of Molecular and Cellular Physiology,  
Stanford Medical School, Stanford, CA, USA

<sup>3</sup> Current address: Ludwig Boltzmann Institute for Experimental and  
Clinical Traumatology in the AUVA Trauma Research Centre, A-1200  
Vienna, Austria

§ Equally contributed.

\*Corresponding author. Email: elena.pohl@vetmeduni.ac.at

|              |                                                                                         |     |
|--------------|-----------------------------------------------------------------------------------------|-----|
| <i>mUCP3</i> | MVGLQPSEVPPTTVVKFLGAGTAACFADLLTF <b>PLDTAK</b> VRLQIQGENPG----AQSVQYR                   | 56  |
| <i>mUCP2</i> | MVGFKATDVPPTATVKFLGAGTAACIADLITF <b>PLDTAK</b> VRLQIQGESQGLVRTAASAQYR                   | 60  |
| <i>mANT1</i> | -----MGDQALSFLKDFLAGGIAAAV <b>SKT</b> AV <b>PIERVK</b> LLLQVQHASKQ---ISA EKQYK          | 52  |
| <i>mUCP3</i> | GVLGTILTMVRTEGPRSPYSGLVAGLH <b>R</b> QMSFASIRIGLYDSVKQFYTPKGADHSSV---                   | 113 |
| <i>mUCP2</i> | GVLGTILTMVRTEGPRSLYNGLVAGLQ <b>R</b> QMSFASVRIGLYDSVKQFYT-KGSEHAGI---                   | 116 |
| <i>mANT1</i> | GIIDCVVRIPKEQGFLSFWRGNLANV <b>I</b> RYFPTQALNFAFKDKYKQIFLGGVDRHKQFWRY                   | 112 |
| <i>mUCP3</i> | -AIRILAGCTTGAMAVTCAQ <b>PTD</b> V <b>VK</b> VRFQAMIRLGTGGERKYRGTMDAYRTIAREEGVR          | 172 |
| <i>mUCP2</i> | -GSRLLAGSTTGALAVAVAQ <b>PTD</b> V <b>VK</b> VRFQAQARA--GGGRRYQSTVEAYKTIAREEGIR          | 173 |
| <i>mANT1</i> | FAGNLASGGAAGATSLCFVY <b>PLDFAR</b> TRLAADVGKG-SSQREFNGLGDCLTKIFKSDGLK                   | 171 |
| <i>mUCP3</i> | GLWKGTWPNIT <b>R</b> NAIVNCAEMVTDYDIIKEKLLESHLFTDNFPCHFVSAFGAGFCATVVAS                  | 232 |
| <i>mUCP2</i> | GLWKGTSPNVA <b>R</b> NAIVNCAELVTDYDLIKDTLLKANLMTDDLPCHTSAFGAGFCTTVIAS                   | 233 |
| <i>mANT1</i> | GLYQGFSVSVQGI <b>I</b> IYRAAYFGVYDTAKGMLPDPKNVHIIV-SWMIAQSVTAVAGLVSY-                   | 229 |
| <i>mUCP3</i> | <b>PVD</b> V <b>VK</b> TRYMNAP-----LGRYRSPLHCMLKMVAQEGPTAFYKGFVPSFL <b>R</b> LGAWNVMMF  | 287 |
| <i>mUCP2</i> | <b>PVD</b> V <b>VK</b> TRYMNSA-----LGQYHSAGHCALTMLRKEGPRAFYKGFMP <b>SFL</b> LGSWNVVMF   | 288 |
| <i>mANT1</i> | <b>PFDTVR</b> RRMMMQSGRKGADIMYTGTLDLCWRKIAKDEGANAFFKGAWSNVL <b>R</b> G <b>M</b> -GGAFVL | 288 |
| <i>mUCP3</i> | VTYEQLKRALMKVQVLRES PF                                                                  | 308 |
| <i>mUCP2</i> | VTYEQLKRALMAAYQSREAPF                                                                   | 309 |
| <i>mANT1</i> | VLYDEIKKYV-----                                                                         | 298 |

**Figure S1. Alignment of the amino acid sequences of murine UCP3, UCP2 and ANT1.**  
The highly conserved PX[DE]XX[KR] signature motif of mitochondrial carriers is marked in blue.  
The three amino acids involved in the putative substrate binding site in the central cavity of mUCP3, mUCP2 and mANT1 are colored in red.

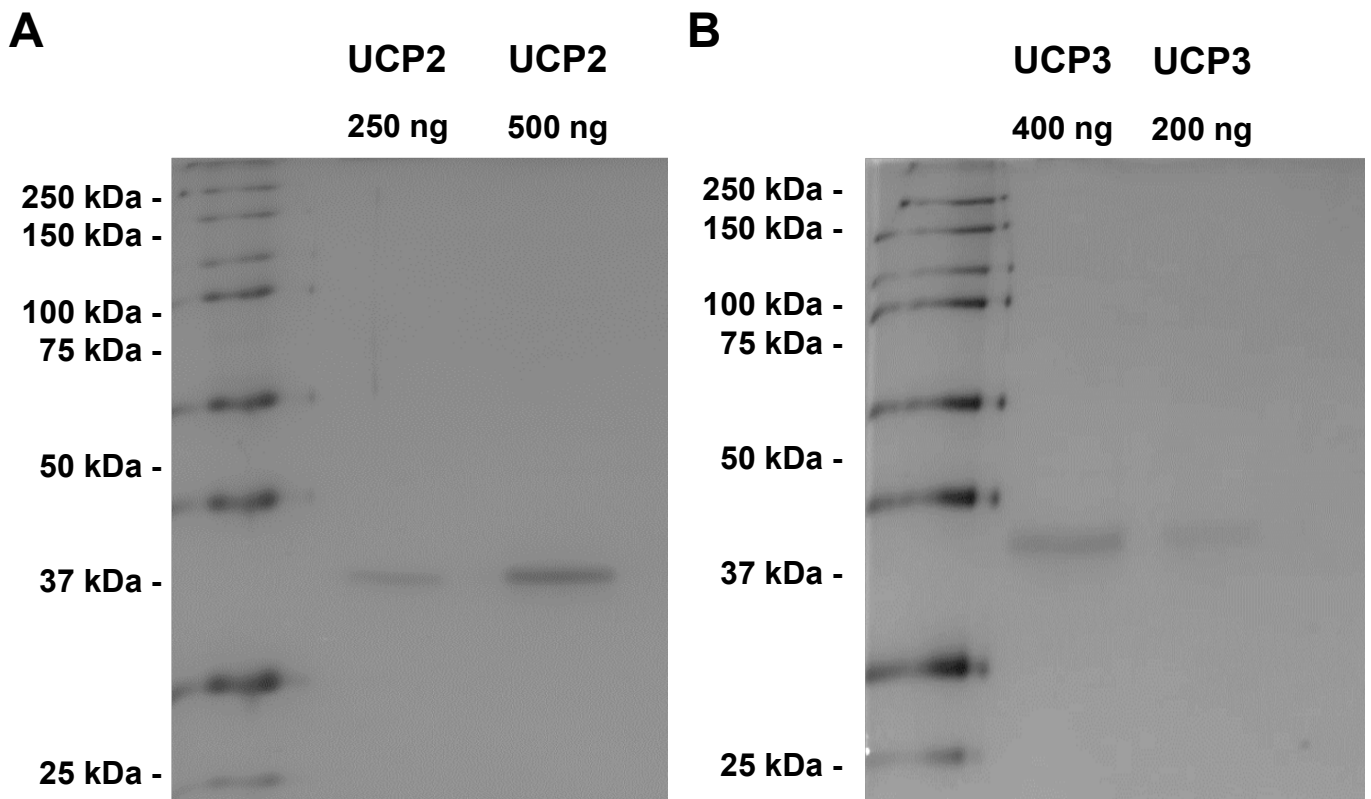

**Figure S2. Representative silver staining of reconstituted UCP2 and UCP3.**

For quality control, 250 ng or 500 ng of UCP2 (A) and 400 ng and 200 ng of UCP3 (B) containing proteoliposomes were loaded onto a 15% acrylamide gel and SDS-PAGE was conducted. Subsequently, proteins were visualized by silver staining.

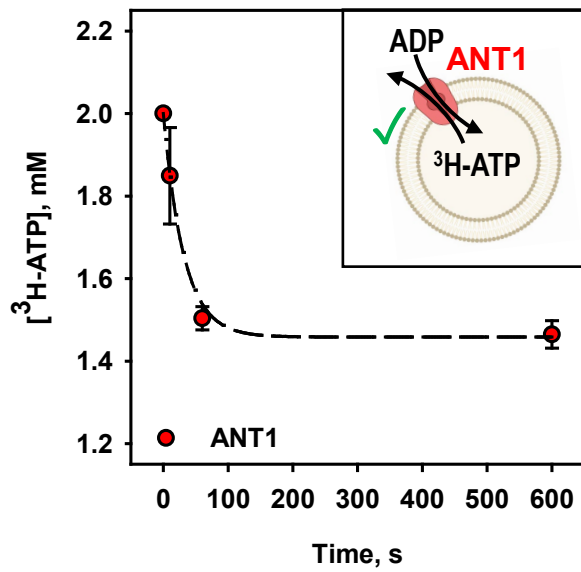

**Figure S3. ANT1-mediated ADP/ATP exchange as a control for ANT1 activity.**

Efflux of ATP from liposomes over time measured by remaining intraliposomal  $^3\text{H}$ -ATP radioactivity of ANT1-containing liposomes. Concentration of intraliposomal  $^3\text{H}$ -ATP and extraliposomal ADP was 2 mM. **Inset:** Experimental setup to test ADP/ATP exchange of ANT1.

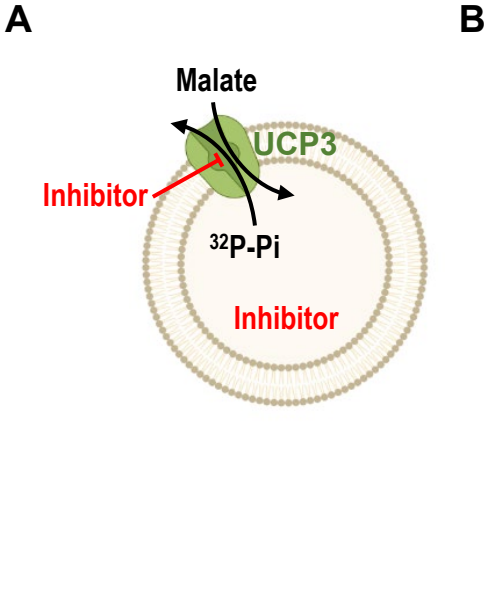

**Figure S4. Inhibition of UCP3-mediated phosphate/malate exchange.**

**(A)** Experimental setup to measure the exchange of  $^{32}\text{P}$ -phosphate against malate in the presence of various inhibitors. **(B)** Remaining  $^{32}\text{P}$ -phosphate in liposomes containing UCP3 after  $T = 600$  s as the ratio to the initial  $^{32}\text{P}$ -phosphate amount at  $T = 0$  s. Concentration of  $^{32}\text{P}$ -phosphate and malate was 2 mM, respectively. In the experiments, the lipid concentration was 4 mg/ml and the protein concentration was 4  $\mu\text{g}/\text{mg}$  of lipid. Membranes were made of 45:45:10 mol% PC:PE:CL. Buffer solution contained 50 mM  $\text{Na}_2\text{SO}_4$ , 10 mM Tris, 10 mM MES and 0.6 mM EGTA at  $\text{pH} = 7.34$  and  $T = 296$  K.

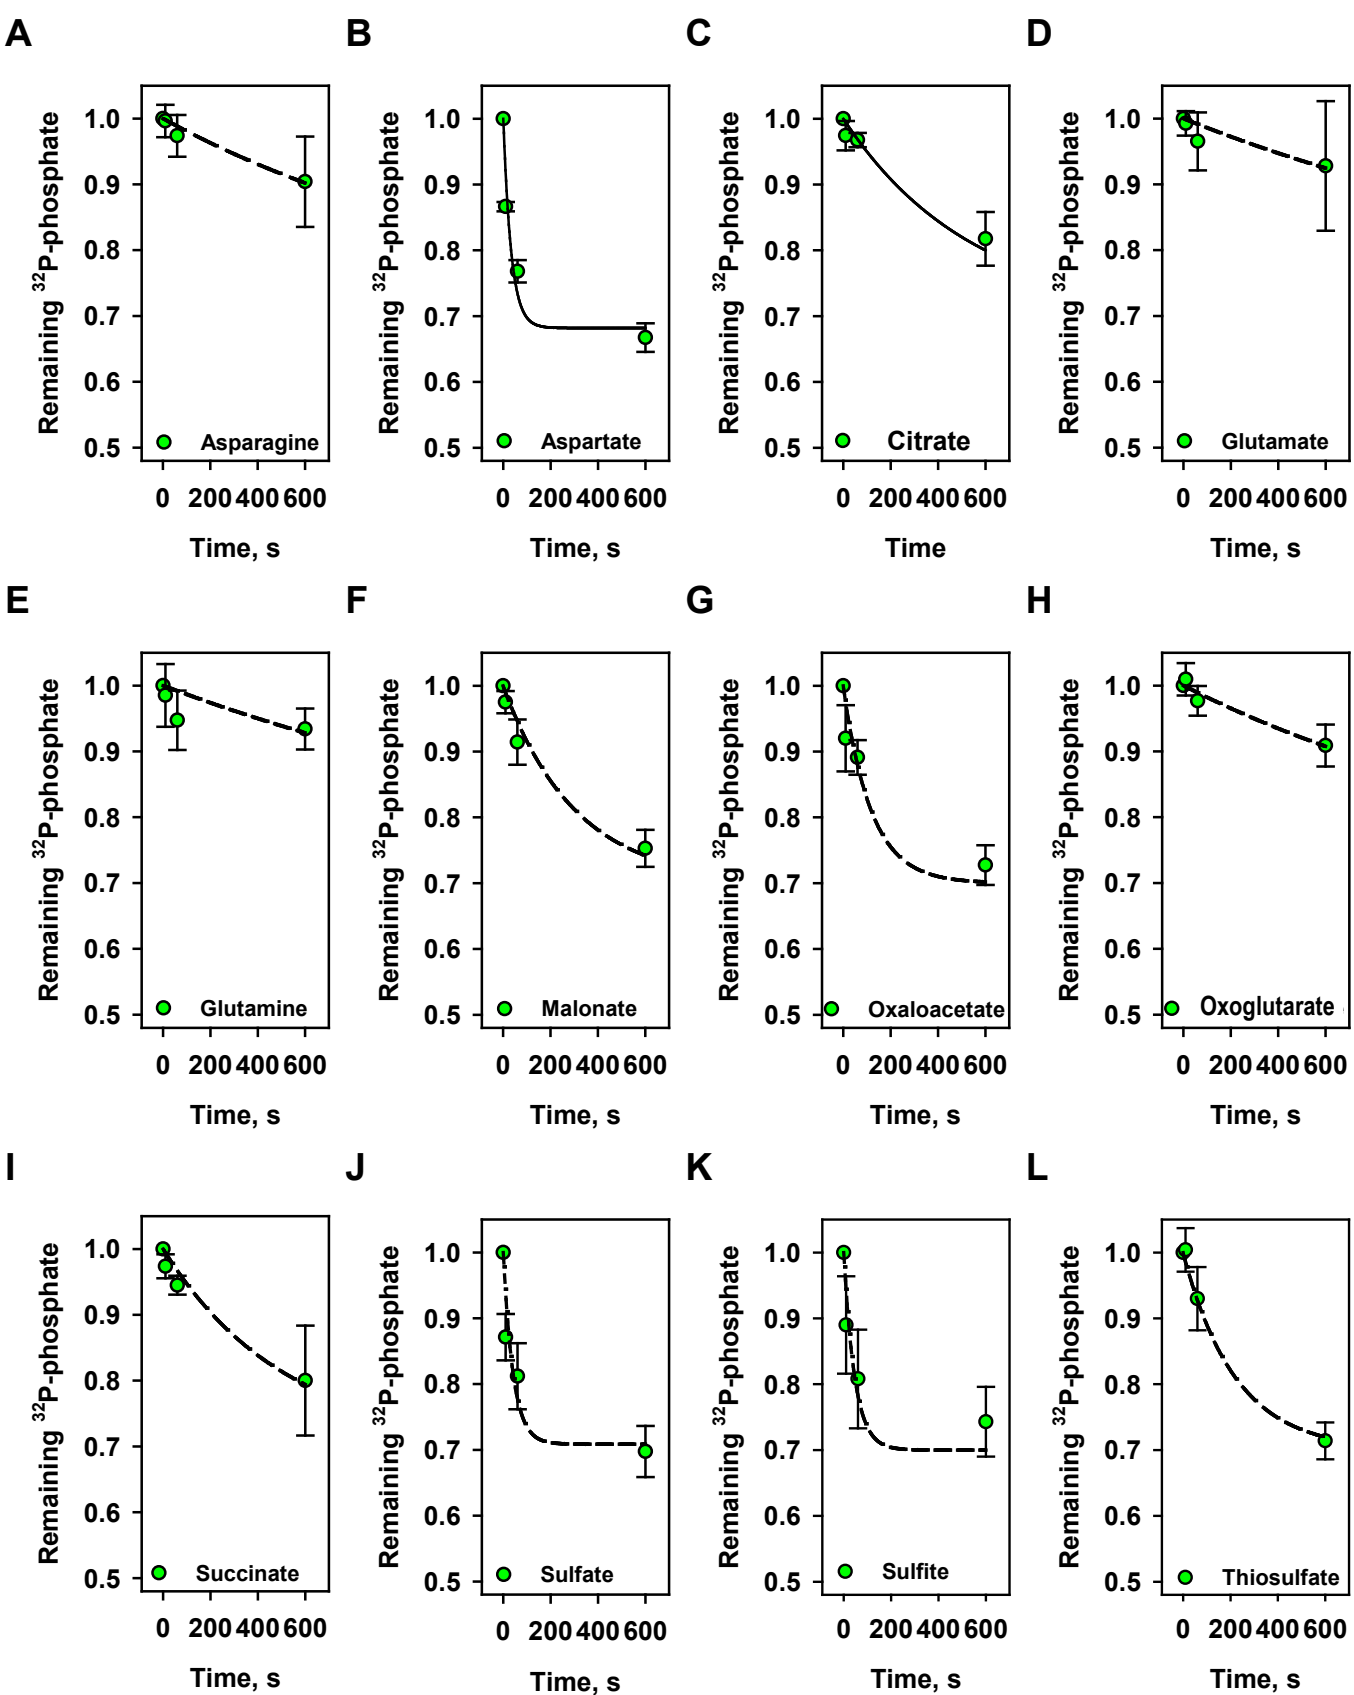

**Figure S5. Evaluation of different substrates as possible metabolites transported by UCP3**

Time course of intraliposomal phosphate concentration in the presence of UCP3 and extraliposomal asparagine (A), aspartate (B), citrate (C), glutamate (D), glutamine (E), malonate (F), oxaloacetate (G), oxoglutarate (H), succinate (I), sulfate (J), sulfite (K) or thiosulfate (L). In the experiments, the lipid concentration was 4 mg/ml and the protein concentration was 4  $\mu\text{g}/\text{mg}$  of lipid. Membranes were made of 45:45:10 mol% PC:PE:CL. Buffer solution contained 50 mM  $\text{Na}_2\text{SO}_4$ , 10 mM Tris, 10 mM MES and 0.6 mM EGTA at pH = 7.34 and T = 296 K. Data are the mean  $\pm$  SD of at least three independent experiments.

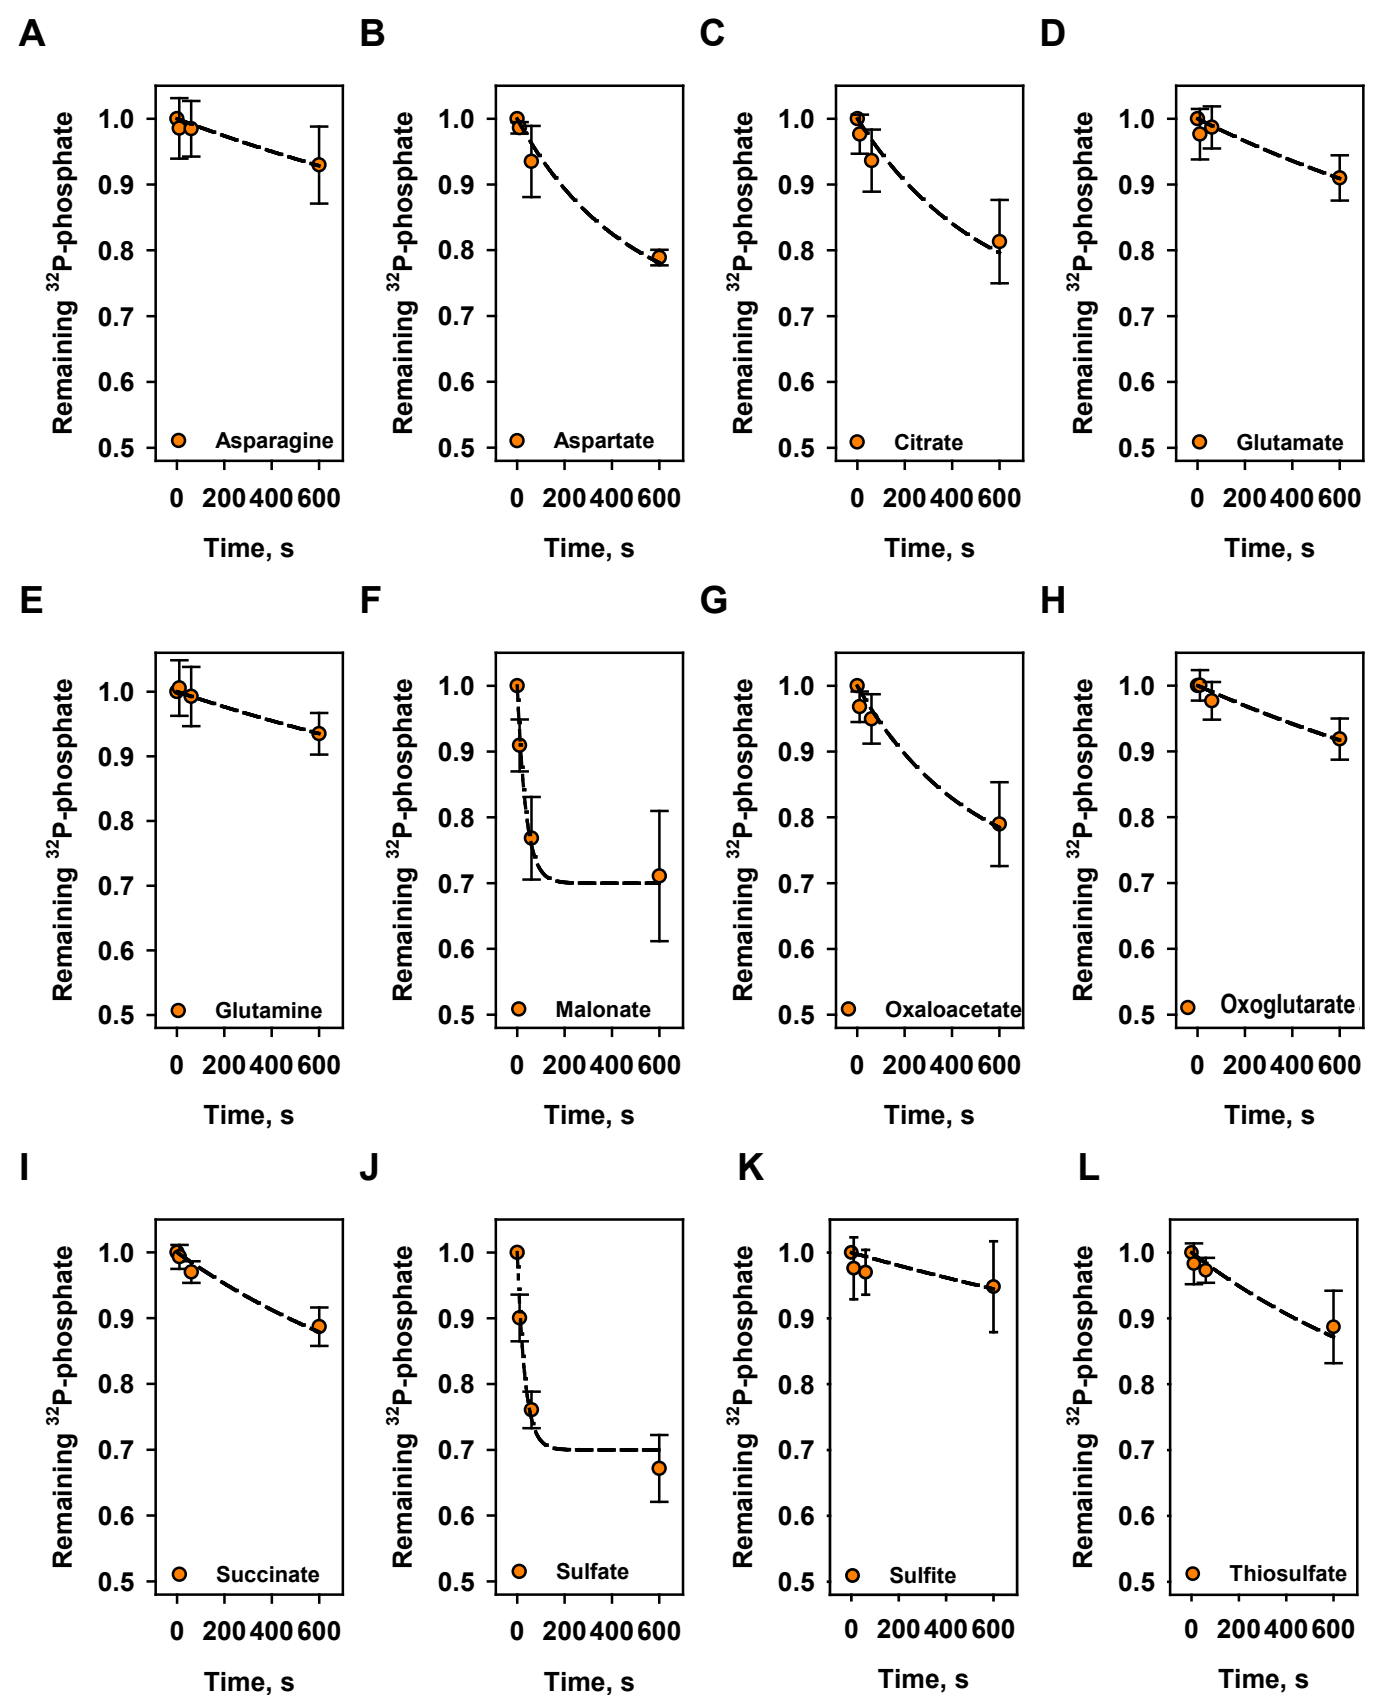

**Figure S6. Evaluation of different substrates as possible metabolites transported by UCP2**

Time course of intraliposomal phosphate concentration in the presence of UCP2 and extraliposomal asparagine (A), aspartate (B), citrate (C), glutamate (D), glutamine (E), malonate (F), oxaloacetate (G), oxoglutarate (H), succinate (I), sulfate (J), sulfite (K) or thiosulfate (L). In the experiments, the lipid concentration was 4 mg/ml and the protein concentration was 4  $\mu\text{g}/\text{mg}$  of lipid. Membranes were made of 45:45:10 mol% PC:PE:CL. Buffer solution contained 50 mM  $\text{Na}_2\text{SO}_4$ , 10 mM Tris, 10 mM MES and 0.6 mM EGTA at pH = 7.34 and T = 296 K. Data are the mean  $\pm$  SD of at least three independent experiments.

**A**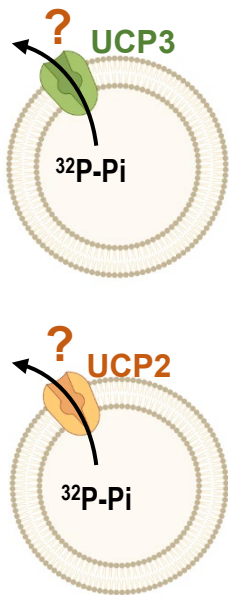**B**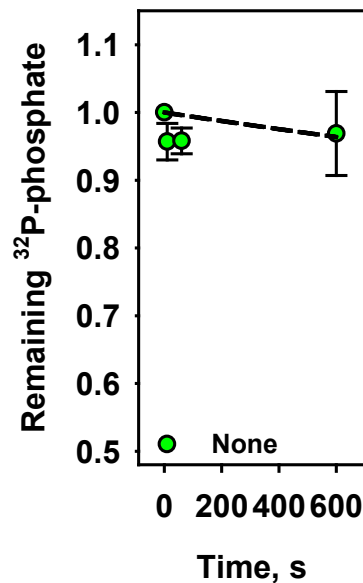**C**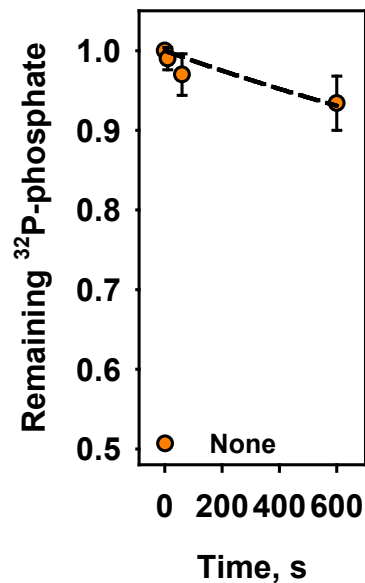

**Figure S7. Uniport transport of phosphate of UCP3 and UCP2**

(A) Release of intraliposomal  $^{32}\text{P}$ -phosphate in the absence of an external substrate. (B, C) Time course of intraliposomal  $^{32}\text{P}$ -phosphate efflux concentration in the presence of liposomes containing UCP3 (B) or UCP2 (C). Concentration of  $^{32}\text{P}$ -phosphate was 2 mM. In the experiments, the lipid concentration was 4 mg/ml and the protein concentration was 4  $\mu\text{g}/\text{mg}$  of lipid. Membranes were made of 45:45:10 mol% PC:PE:CL. Buffer solution contained 50 mM  $\text{Na}_2\text{SO}_4$ , 10 mM Tris, 10 mM MES and 0.6 mM EGTA at pH = 7.34 and T = 296 K.



**Table S1: Overview of transport rates of various mitochondrial carriers reconstituted into liposomes.** Abbreviations are: cit – citrate, mal – malate, 2-oxog – oxoglutarate, Pi – phosphate, asp – aspartate, glu – glutamate and cys - cysteinsulfinate

| Protein                                            | Species | Transport rate,<br>mmol/min/g protein | Substrates         | Ref.      |
|----------------------------------------------------|---------|---------------------------------------|--------------------|-----------|
| Citrate carrier<br>(CiC – SLC25A1)                 | Rat     | 2.05 ± 0.09                           | cit/cit            | [1]       |
|                                                    |         | 1.87 ± 0.11                           | mal/cit            |           |
|                                                    |         | 2.06 ± 0.13                           |                    |           |
|                                                    |         | 1.98 ± 0.16                           | mal/mal            |           |
| Phosphate carrier<br>(PiC – SLC25A3)               | Bovine  | 70 - 90                               | Pi/Pi              | [2]       |
|                                                    |         | 30                                    | Pi/OH <sup>-</sup> |           |
| Dicarboxylate carrier<br>(DiC – SLC25A10)          | Rat     | 6.4 – 6.7                             | mal/Pi             | [3]       |
|                                                    |         | 7.3                                   | mal/mal            |           |
| Oxoglutarate carrier<br>(OGC – SLC25A11)           | Bovine  | 2.96 - 22                             | oxog/oxog          | [4] – [6] |
|                                                    |         | 10.34 ± 0.37                          |                    | [7]       |
| Aspartate/glutamate carrier 1<br>(AGC1 – SLC25A12) | Human   | 25.5 – 40.5                           | asp/asp            | [8]       |
|                                                    |         | 16.1 – 23.7                           | asp/glu            |           |
|                                                    |         | 21.8                                  | glu/glu            |           |
|                                                    |         | 17.7 – 27.6                           | asp/cys            |           |
|                                                    |         | 14.2                                  | glu/cys            |           |
| Aspartate/glutamate carrier 2<br>(AGC2 – SLC25A13) |         | 92.8 – 178.4                          | asp/asp            |           |
|                                                    |         | 55.3 – 118                            | asp/glu            |           |
|                                                    |         | 90.3                                  | glu/glu            |           |
|                                                    |         | 81.2 – 133.8                          | asp/cys            |           |
|                                                    |         | 65.9                                  | glu/cys            |           |

[1] Bisaccia, F., De Palma, A., Prezioso, G., and Palmieri, F. (1990) Kinetic characterization of the reconstituted tricarboxylate carrier from rat liver mitochondria. *Biochim. Biophys. Acta.* 1019, 250–256.

[2] Stappen, R., & Krämer, R. (1993). Functional properties of the reconstituted phosphate carrier from bovine heart mitochondria: evidence for asymmetric orientation and characterization of three different transport modes. *Biochimica et Biophysica Acta (BBA)-Biomembranes*, 1149(1), 40-48.

[3] Indiveri, C., Prezioso, G., Dierks, T., Krämer, R., & Palmieri, F. (1993). Kinetic characterization of the reconstituted dicarboxylate carrier from mitochondria: a four-binding-site sequential transport system. *Biochimica et Biophysica Acta (BBA)-Bioenergetics*, 1143(3), 310-318.

[4] Indiveri C, Palmieri F, Bisaccia F, Krämer R (1987b) Kinetics of the reconstituted 2-oxoglutarate carrier from bovine heart mitochondria. *Biochim Biophys Acta* 890:310–318

[5] Indiveri C, Dierks T, Krämer R, Palmieri F (1991a) Reaction mechanism of the reconstituted oxoglutarate carrier from bovine heart mitochondria. *Eur J Biochem* 198:339–347

[6] Fiermonte G, Walker JE, Palmieri F (1993) Abundant bacterial expression and reconstitution of an intrinsic membrane-transport protein from bovine mitochondria. *Biochem J* 294:293–299

[7] Smith, V. R., & Walker, J. E. (2003). Purification and folding of recombinant bovine oxoglutarate/malate carrier by immobilized metal-ion affinity chromatography. *Protein expression and purification*, 29(2), 209-216.

[8] Palmieri, L., Pardo, B., Lasorsa, F. M., Del Arco, A., Kobayashi, K., Iijima, M., ... & Palmieri, F. (2001). Citrin and aralar1 are Ca2+-stimulated aspartate/glutamate transporters in mitochondria. *The EMBO journal*, 20(18), 5060-5069.
